# Supplementary material
Source: PubMed Central journal article supplement (PMC6479047)
Supplement: IAI.00114-19-s0001.pdf [file IAI.00114-19-s0001.pdf]

## Supplemental Data

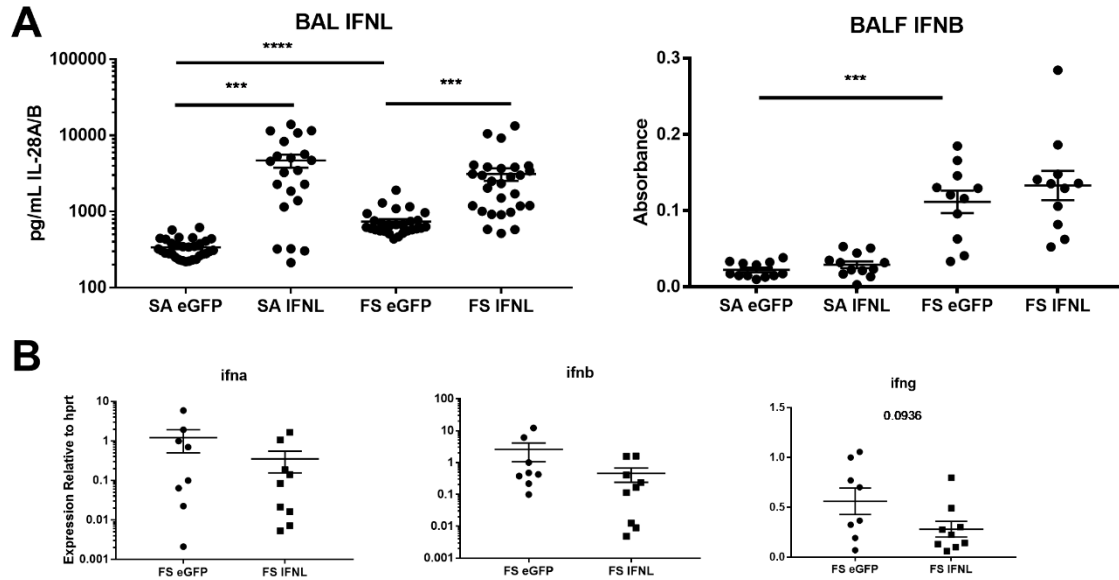

**Figure S1.**

### **IFNλ overexpression does not alter other interferons.**

Mice were infected with influenza, five days later given adenovirus to overexpress IFNλ (Ad-IFNλ) or GFP (Ad-GFP), and twenty-four hours later challenged with  $5 \times 10^7$  CFU MRSA as described in Figure 1. (A) ELISA for IFNλ or IFNβ in BALF (n = 4, three to eight independent experiments). (B) RT-PCR for interferon genes in lung RNA (n = 4, three independent experiments) \*p < 0.05, \*\*p < 0.01, \*\*\* p < 0.005, ns = not significant.

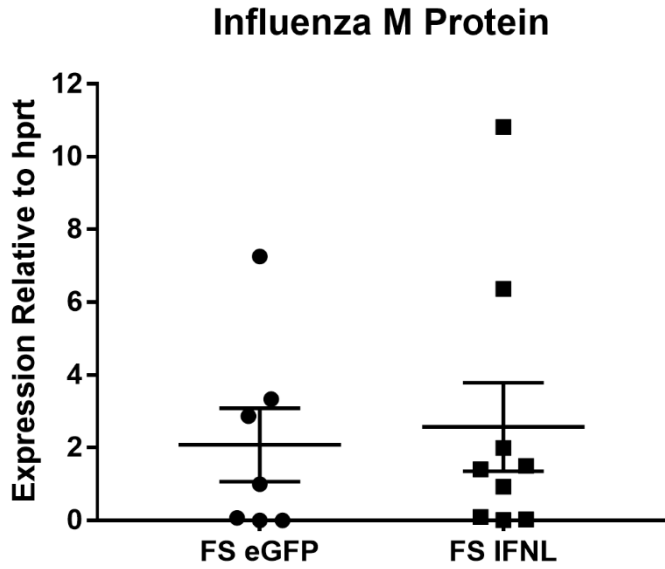

**Figure S2.**

**IFN $\lambda$  overexpression does not alter influenza viral burden.**

Mice were infected with influenza, five days later given adenovirus to overexpress IFN $\lambda$  (Ad-IFN $\lambda$ ) or GFP (Ad-GFP), and twenty-four hours later challenged with  $5 \times 10^7$  CFU MRSA as described in Figure 1. (A) RT-PCR for influenza A/PR/8/34 H1N1 M protein in lung RNA (n = 4, two independent experiments). \*p < 0.05, \*\*p < 0.01, \*\*\* p < 0.005, ns = not significant.

| CYTOKINE | FS EGFP              | FS IFNL              | SIGNIFICANCE | P-VALUE       |
|----------|----------------------|----------------------|--------------|---------------|
| EOTAXIN  | 2192 ± 602.9         | 2722 ± 780.4         |              | 0.5969        |
| G-CSF    | <b>1734 ± 233.7</b>  | <b>3172 ± 350.7</b>  | **           | <b>0.0032</b> |
| GM-CSF   | 51.8 ± 4.484         | 54.31 ± 5.076        |              | 0.7153        |
| IFNG     | 89.82 ± 15.33        | 87.61 ± 13.11        |              | 0.9139        |
| IL-10    | 155.3 ± 36.67        | 100.6 ± 15.61        |              | 0.192         |
| IL-12P40 | 129.2 ± 13.27        | 147 ± 21.05          |              | 0.4838        |
| IL-12P70 | 186.4 ± 16.18        | 203.4 ± 16.14        |              | 0.4649        |
| IL-13    | 52.41 ± 12.1         | 62.58 ± 13.65        |              | 0.5836        |
| IL-17A   | 82.27 ± 15.97        | 82.54 ± 15.18        |              | 0.9901        |
| IL-1A    | <b>176.3 ± 24.06</b> | <b>248.4 ± 21.25</b> | *            | <b>0.0363</b> |
| IL-1B    | 57.88 ± 4.573        | 74.5 ± 8.911         |              | 0.1181        |
| IL-2     | 69.99 ± 13.24        | 76.65 ± 13.72        |              | 0.7305        |
| IL-3     | 30 ± 6.312           | 29.3 ± 5.856         |              | 0.9367        |
| IL-5     | 36.02 ± 6.619        | 32.38 ± 5.341        |              | 0.6733        |
| IL-6     | 248.9 ± 30.36        | 285.5 ± 44.74        |              | 0.5069        |
| IL-9     | 105.9 ± 17.06        | 111.5 ± 16.8         |              | 0.8198        |
| KC       | <b>380.9 ± 31.37</b> | <b>625.4 ± 53.82</b> | **           | <b>0.0012</b> |
| MCP-1    | 4184 ± 893.5         | 3072 ± 563.6         |              | 0.3074        |
| MIP-1A   | 2039 ± 277.9         | 2108 ± 338.6         |              | 0.8753        |
| MIP-1B   | 1242 ± 146           | 1138 ± 158.6         |              | 0.6332        |
| RANTES   | 2879 ± 423.5         | 2385 ± 517.1         |              | 0.4685        |
| TNFA     | 207.1 ± 25.77        | 276.9 ± 36.97        |              | 0.1389        |

### **Figure S3.**

#### **IFN $\lambda$ overexpression does not alter other inflammatory chemokines.**

Mice were infected with influenza, five days later given adenovirus to overexpress IFN $\lambda$  (Ad-IFN $\lambda$ ) or GFP (Ad-GFP), and twenty-four hours later challenged with  $5 \times 10^7$  CFU MRSA as described in Figure 1. Lungs were snap-frozen, homogenized, and the supernatant assayed for inflammatory cytokines by multiplex (n=12, three independent experiments). Data are reported as mean  $\pm$  SEM, with significance and p-value calculated by Welch's t-test.

**Figure S4**

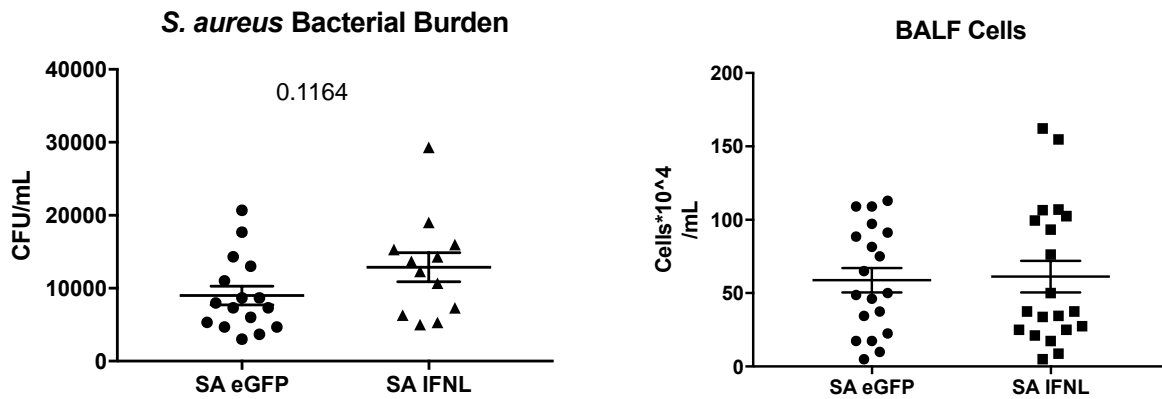

**Figure S4.**

**IFN $\lambda$  overexpression does not alter bacterial burden during MRSA lung infection alone.**

Mice were infected with influenza, five days later given adenovirus to overexpress IFN $\lambda$  (Ad-IFN $\lambda$ ) or GFP (Ad-GFP), and twenty-four hours later challenged with  $5 \times 10^7$  CFU MRSA as described in Figure 1. Bacterial burden was determined by counting CFU from plated lung homogenate. BALF cell number was determined by lavaging mouse lungs at time of sacrifice with 1 mL sterile PBS, performing red blood cell lysis, and resuspending in PBS and counting total cells on a hemocytometer.

**Figure S5**

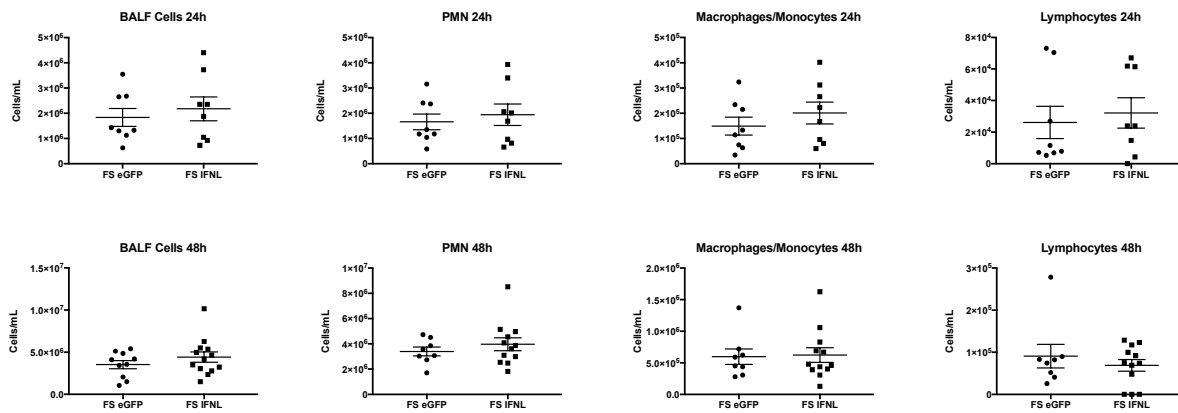

**Figure S5.**

**IFN $\lambda$  overexpression does not alter bronchoalveolar lavage cells during influenza/*S. pneumoniae* super-infection.**

Mice were infected with influenza, five days later given adenovirus to overexpress IFN $\lambda$  (Ad-IFN $\lambda$ ) or GFP (Ad-GFP), and twenty-four hours later challenged with 1000 CFU *S. pneumoniae*. Mice were sacrificed either 24 or 48 hours later. Lungs were lavaged with 1 mL sterile PBS and the resulting bronchoalveolar lavage fluid (BALF) was processed by cytopspin and BALF cells were differentially counted after staining (Diff-Quik).
